# Supplementary material for: Distinctive Patterns of Flavonoid Biosynthesis in Roots and Nodules of Datisca glomerata and Medicago spp. Revealed by Metabolomic and Gene Expression Profiles
Source: Front Plant Sci. 2018 Oct 10;9:1463. doi: 10.3389/fpls.2018.01463 (PMC6192435; doi:10.3389/fpls.2018.01463)
Supplement: TABLE S1 — Collection data for root and nodule samples of D. glomerata and M. sativa. [file Table_1.XLSX]

## Sheet: Samples Collected
D. glomerata Metabolome LC-MS Samples
Sample Name	Tissue	Collection Date	Mass Collected (mg)
Dg04-01Ri	Inoculated Roots	2015-05-29	196
Dg04-04Ri	Inoculated Roots	2015-05-29	194
Dg04-05Ri	Inoculated Roots	2015-05-29	182
Dg04-06Ri	Inoculated Roots	2015-05-29	200
Dg04-08Ri	Inoculated Roots	2015-05-29	192
Dg04-09Ri	Inoculated Roots	2015-05-29	202
Dg04-33Ri	Inoculated Roots	2015-05-29	230
Dg04-42Ri	Inoculated Roots	2015-05-29	180
Dg04-66Ri	Inoculated Roots	2015-05-29	110
Dg04-67Ri	Inoculated Roots	2015-05-29	200
Dg04-01N	Nodules	2015-05-29	185
Dg04-04N	Nodules	2015-05-29	200
Dg04-05N	Nodules	2015-05-29	196
Dg04-06N	Nodules	2015-05-29	187
Dg04-08N	Nodules	2015-05-29	180
Dg04-09N	Nodules	2015-05-29	210
Dg04-33N	Nodules	2015-05-29	200
Dg04-42N	Nodules	2015-05-29	220
Dg04-66N	Nodules	2015-05-29	186
Dg04-67N	Nodules	2015-05-29	200
M. sativa Metabolome LC-MS Samples
Ms01-01Ri	Inoculated Roots	5/29/2015	149
Ms01-03Ri	Inoculated Roots	5/29/2015	333
Ms01-04Ri	Inoculated Roots	5/29/2015	491
Ms01-05Ri	Inoculated Roots	5/29/2015	379
Ms01-01N	Nodules	5/29/2015	201
Ms01-03N	Nodules	5/29/2015	245
Ms01-04N	Nodules	5/29/2015	105
Ms01-05N	Nodules	5/29/2015	126
HPLC/LC-MS Samples
Dg05-p01Ri	Inoculated Roots	5/21/2015	252
Dg05-p02Ri	Inoculated Roots	5/21/2015	327
Dg05-p03Ri	Inoculated Roots	5/21/2015	207
Dg05-p04Ri	Inoculated Roots	5/21/2015	436
Dg05-p01N	Nodules	5/21/2015	80
Dg05-p02N	Nodules	5/21/2015	203
Dg05-p03N	Nodules	5/21/2015	157
Dg05-p04N	Nodules	5/21/2015	138
Dg05-p01Ru	Uninoculated Roots	1/22/2015	181
Dg05-p02Ru	Uninoculated Roots	1/22/2015	180
Dg05-p03Ru	Uninoculated Roots	1/22/2015	201
Dg05-p04Ru	Uninoculated Roots	1/22/2015	396
